# Supplementary material for: The effect of oxygen impurities on the stability and structural properties of vacancy-ordered and -disordered ZrCx
Source: Royal Society of Chemistry journal article supplement (doi:10.1039/d1ra07768f), 2022-01-01
Supplement: d1ra07768f1.zip [file d1ra07768f1.zip]

## Sheet: Sheet1
Phase	Space group	Space group number	Lattice parameters (A)	Oxygen site	Wyckoff site	(	x	,	y	,	z	)	Defect type	#Zr	#C	#Va	#O	Volume /Zr atom (A3)	Formation energy (eV/atom)	O defect formation energy (eV/defect)
Zr2C	Fd3-m	227	a=9.27273	-									pristine	32	16	16	0	24.9157	-0.683875	-
				Zr	32e	(	0.13103	,	0.36897	,	0.13103	)	(i)	31	16	16	1	24.8119	-0.5765	5.154
				C	16d	(	0.875	,	0.875	,	0.125	)	(ii)	32	15	16	1	24.8259	-0.779213	-4.57622
				Va	16c	(	0.375	,	0.375	,	0.625	)	(iii)	8	4	3	1	24.4817	-1.18812	-7.23906		(i) A substitutional defect on the Zr sites.
														16	8	7	1	24.7173	-0.946464	-7.24859		(ii) A substitutional defect on a C site.
														24	12	11	1	24.7848	-0.861276	-7.24771		(iii) An octahedral interstitial defect in a vacancy C site.
														32	16	15	1	24.8198	-0.81919	-7.31433		(iv) An interstitial defect in the tetrahedral interstitial sites.
														64	32	31	1	24.8702	-0.752354	-7.3263
														96	48	47	1	24.8855	-0.729804	-7.34355
														128	64	63	1	24.8924	-0.718501	-7.36668
														32	16	8	8	24.3261	-1.59438	-7.05739
														32	16	0	16	24.1997	-2.18426	-6.68542
				tet	8a	(	0.25	,	0.25	,	0.25	)	(iv)	32	16	16	1	24.2717	-0.736517	-3.26333	* O atom not stable at defect site so only volume relaxation was performed
					8a	(	0.25	,	0.25	,	0.75	)		32	16	16	1	25.3208	-0.682631	-0.622897
					48f	(	0.5	,	0.5	,	0.25	)		32	16	16	1	24.3685	-0.662097	0.383243	* O atom not stable at defect site so only volume relaxation was performed
Zr3C2	Fddd	70	a=6.55014	-									pristine	12	8	4	0	25.0428	-0.8179	-
			b=9.32001	Zr	32h	(	0.50627	,	0.24144	,	0.08046	)	(i)	35	24	12	1	25.0224	-0.698003	7.19382
			c=19.69019		16e	(	0.25943	,	0	,	0	)		35	24	12	1	25.0612	-0.708814	6.54516
				C	16g	(	0.5	,	0.5	,	0.41744	)	(ii)	36	23	12	1	24.9445	-0.900747	-4.97082
					16g	(	0.5	,	0.5	,	0.25033	)		36	23	12	1	24.9419	-0.903352	-5.12709
				Va	16g	(	0.25	,	0.75	,	0.66667	)	(iii)	12	8	3	1	24.854	-1.1169	-7.09696
														24	16	7	1	24.9419	-0.972455	-7.15467
														36	24	11	1	24.9784	-0.92175	-7.15276
														60	40	19	1	24.9966	-0.880691	-7.15976
														96	64	31	1	25.0122	-0.857394	-7.17644
														132	88	43	1	25.0193	-0.846745	-7.19252
														12	8	0	4	24.4974	-1.79636	-6.68866
													mixed	12	7	0	5	24.3287	-1.97866	-6.22597
				tet	32h	(	0.5	,	0.375	,	0.166667	)	(iv)	36	24	12	1	24.6069	-0.667457	8.35914	* O atom not stable at defect site so only volume relaxation was performed
					32h	(	0.75	,	0.125	,	0.08333	)		36	24	12	1	25.367	-0.817714	-0.806537
					16f	(	0.5	,	0.375	,	0.5	)		36	24	12	1	24.6719	-0.659501	8.84445	* O atom not stable at defect site so only volume relaxation was performed
					16f	(	0.5	,	0.875	,	0.5	)		36	24	12	1	24.5869	-0.643229	9.83703	* O atom not stable at defect site so only volume relaxation was performed
Zr4C3	C2/c	15	a=6.55985	-									pristine	16	12	4	0	25.1304	-0.864734	-
			b=13.16493	Zr	8f	(	0.24388	,	0.1921	,	0.24949	)	(i)	31	24	8	1	25.0918	-0.733262	7.36242
			c=5.69834		8f	(	0.23423	,	0.0665	,	0.72964	)		31	24	8	1	25.1632	-0.710062	8.66165
			b=125.2076	C	4e	(	0	,	0.18418	,	0.75	)	(ii)	32	23	8	1	25.038	-0.955834	-5.10162
					4e	(	0	,	0.93793	,	0.75	)		32	23	8	1	25.0412	-0.956015	-5.11175
					4e	(	0	,	0.68723	,	0.75	)		32	23	8	1	25.0343	-0.955384	-5.07641
				Va	4e	(	0	,	0.56415	,	0.25	)	(iii)	8	6	1	1	24.8098	-1.27184	-6.97132
														16	12	3	1	24.9599	-1.07797	-7.04846
														16	12	3	1	24.9697	-1.07569	-6.98257
														32	24	7	1	25.0398	-0.972248	-6.99303
														48	36	11	1	25.0676	-0.937109	-7.0166
														64	48	15	1	25.083	-0.919438	-7.04634
														64	48	15	1	25.0822	-0.919198	-7.01924
														96	72	23	1	25.0968	-0.901418	-7.06438
														128	96	31	1	25.104	-0.892344	-7.07702
														16	12	0	4	24.6484	-1.59499	-6.70675
													mixed	16	11	0	5	24.5312	-1.74085	-6.29894
				tet	8f	(	0.375	,	0.5644	,	0.5	)	(iv)	32	24	8	1	25.3987	-0.862257	-0.723577	* O atom not stable at defect site so only volume relaxation was performed
					8f	(	0.625	,	0.19095	,	0.5	)		32	24	8	1	25.4916	-0.867792	-1.03907
					8f	(	0.375	,	0.31328	,	0.5	)		32	24	8	1	25.4021	-0.860207	-0.606717	* O atom not stable at defect site so only volume relaxation was performed
					8f	(	0.875	,	0.56116	,	0.5	)		32	24	8	1	25.3313	-0.890449	-2.33049	* O atom not stable at defect site so only volume relaxation was performed
Zr7C6	R3-	148	a=8.68908	-									pristine	21	18	3	0	25.1609	-0.907919	-
			c=8.08105	Zr	3b	(	0	,	0	,	0.5	)	(i)	41	36	6	1	25.1823	-0.767928	10.9193
					18f	(	0.75508	,	0.8004	,	0.17412	)		41	36	6	1	25.1594	-0.788812	9.29038
				C	18f	(	0.57421	,	0.86037	,	0.00093	)	(ii)	42	35	7	1	25.0952	-0.977373	-5.41737
				Va	3a	(	0.33333	,	0.66667	,	0.66667	)	(iii)	7	6	0	1	24.8287	-1.31642	-6.62691
														14	12	1	1	24.9822	-1.12225	-6.69474
														21	18	2	1	25.0292	-1.05364	-6.73674
														42	36	5	1	25.0913	-0.981773	-6.74241
														63	54	8	1	25.1136	-0.9574	-6.74667
														105	90	14	1	25.1298	-0.937807	-6.76601
														126	108	17	1	25.134	-0.932894	-6.77708
														21	18	0	3	24.8293	-1.31658	-6.6291
													mixed	21	17	0	4	24.7535	-1.43972	-6.26488
				tet	18f	(	0.57631	,	0.86667	,	0.25	)	(iv)	42	36	6	1	25.4154	-0.906758	-0.816217
					18f	(	0.52149	,	0.625	,	0.58333	)		42	36	6	1	25.3566	-0.90422	-0.615677	* O atom not stable at defect site so only volume relaxation was performed
					6c	(	0.33333	,	0.66667	,	0.41667	)		42	36	6	1	25.349	-0.90929	-1.01621	* O atom not stable at defect site so only volume relaxation was performed
ZrC	Fm3-m	225	a=4.645076379	-									pristine	32	32	0	0	25.0564	-0.916515	-
				Zr	4a	(	0	,	0	,	0	)	(i)	31	32	0	1	25.0319	-0.74394	11.0448
				C	4b	(	0.5	,	0	,	0	)	(ii)	4	3	0	1	24.5018	-1.56085	-5.15467
														8	7	0	1	24.8185	-1.25434	-5.40515
														12	11	0	1	24.9133	-1.14288	-5.4328
														16	15	0	1	24.9503	-1.09145	-5.59778
														20	19	0	1	24.9733	-1.05124	-5.38905
														24	23	0	1	24.9918	-1.03379	-5.62911
														32	31	0	1	25.008	-1.00631	-5.74661
														32	31	0	1	25.0094	-1.00458	-5.63644
														64	63	0	1	25.0322	-0.961676	-5.78055
														96	95	0	1	25.0387	-0.946735	-5.80223
														128	127	0	1	25.0419	-0.939096	-5.78071
				tet	8c	(	0.25	,	0.75	,	0.75	)	(iv)	32	32	0	1	25.3328	-0.904595	-0.141707
														64	64	0	1	25.193	-0.909858	-0.0577165
SQS														32	16	16	0	24.588	-0.598503
														32	20	12	0	24.879	-0.714408
														32	24	8	0	25.0721	-0.816728
														32	28	4	0	25.117	-0.891759
														32	32	0	0	25.0564	-0.916515
														32	16	15	1	24.5298	-0.731181
														32	19	12	1	24.8112	-0.814315
														32	22	9	1	24.9258	-0.890474
														32	25	6	1	25.0171	-0.947397
														32	28	3	1	25.0616	-0.989214
														32	31	0	1	25.0094	-1.00458
														96	48	42	6	24.5342	-0.861408
														96	57	33	6	24.7379	-0.93444
														96	66	24	6	24.8611	-1.00246
														96	75	15	6	24.9429	-1.05446
														96	84	6	6	24.9901	-1.0862
														16	15	0	1	24.9503	-1.09145
														96	48	36	12	24.4772	-1.10906
														96	57	27	12	24.6325	-1.16367
														96	66	18	12	24.7677	-1.21229
														96	75	9	12	24.8253	-1.2448
														96	84	0	12	24.8854	-1.26115
														96	48	24	24	24.2941	-1.52229
														96	54	18	24	24.3927	-1.54121
														96	60	12	24	24.5118	-1.55837
														96	66	6	24	24.5719	-1.56696
														96	72	0	24	24.655	-1.57281
